# Supplementary material
Source: PubMed Central journal article supplement (PMC4042792)
Supplement: JCM.03584-13_zjm999093405so1.pdf [file JCM.03584-13_zjm999093405so1.pdf]

## QUESTIONNAIRE

Code \_\_\_\_\_

Sex

- Male
- Female

Nationality \_\_\_\_\_

Age \_\_\_\_\_ Date of birth \_\_\_\_\_

Do you smoke currently?

- YES
- NO
- Non-responder

How many subjects do you usually live?

- 1
- 2
- 3
- 4
- > 4
- Non-responder

Number of smokers among subjects who usually live with you

- 1
- 2
- 3
- 4
- > 4
- none
- Non-responder
